# Supplementary material for: An in planta biolistic method for stable wheat transformation
Source: PubMed Central journal article supplement (PMC5597576; doi:10.1038/s41598-017-11936-0), 2017-09-13
Supplement: 41598_2017_11936_MOESM1_ESM.pdf [file 41598_2017_11936_MOESM1_ESM.pdf]

# Supplementary Information

## ***An in planta* biolistic method for stable wheat transformation**

Haruyasu Hamada<sup>1,2</sup>, Qianyan Linghu<sup>1</sup>, Yozo Nagira<sup>2</sup>, Ryuji Miki<sup>2</sup>, Naoaki  
Taoka<sup>2</sup> & Ryozo Imai<sup>1,3,\*</sup>

<sup>1</sup>Hokkaido Agriculture Research Centre, National Agriculture and Food Research Organization Toyohira-ku, Sapporo 062-8555, Japan.

<sup>2</sup>Biotechnology Development Laboratories, KANEKA CORPORATION, Takasago, Japan.

<sup>3</sup>Institute of Agrobiological Sciences, National Agriculture and Food Research Organization, 2-1-2 Kannondai, Tsukuba 305-8602, Japan.

\*Correspondence and requests for materials should be addressed to R.I. (e-mail: rzi@affrc.go.jp).

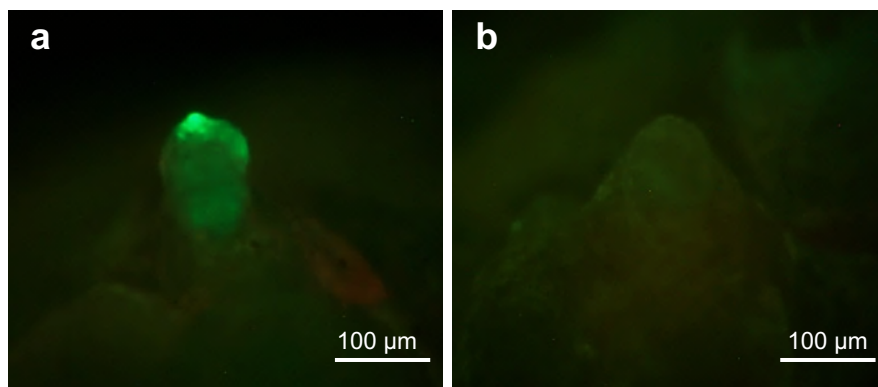

**Supplementary Figure S1. Representative GFP images of a SAM bombarded with a GFP expression (a) and empty (b) vectors.** Bombarded mature embryos were observed with an MZFLIII microscope equipped with a GFP filter (excitation wavelength, 470/40 nm; emission wavelength, 525/50 nm). The bombardment was carried out with 0.6 µm particles and 1,350 psi helium pressure.

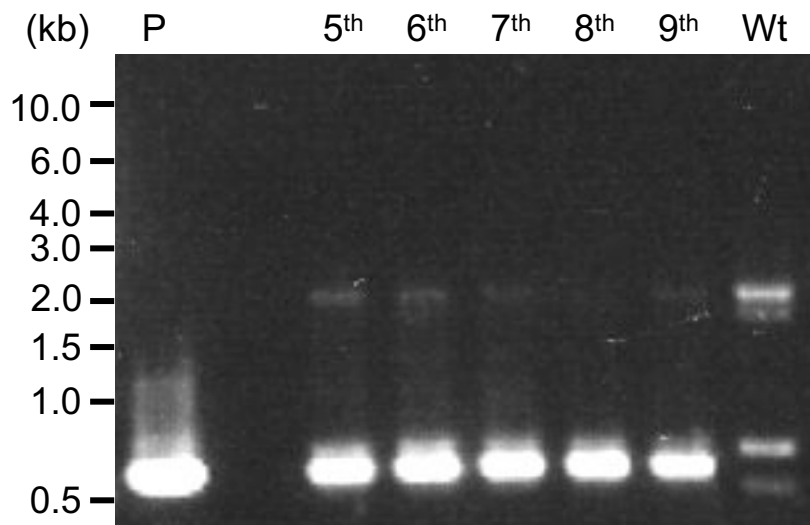

**Supplementary Figure S2. Representative PCR screen data from  $T_0$  progeny.** Genomic DNA from the indicated number of leaves in a putative transgenic wheat transformed using a combination of 0.6  $\mu\text{m}$  particles and 1,350 psi helium pressure. The introduced GFP plasmid (P, 1 ng) and the fifth leaf from the wild-type (Wt) plant were used as positive and negative controls, respectively.

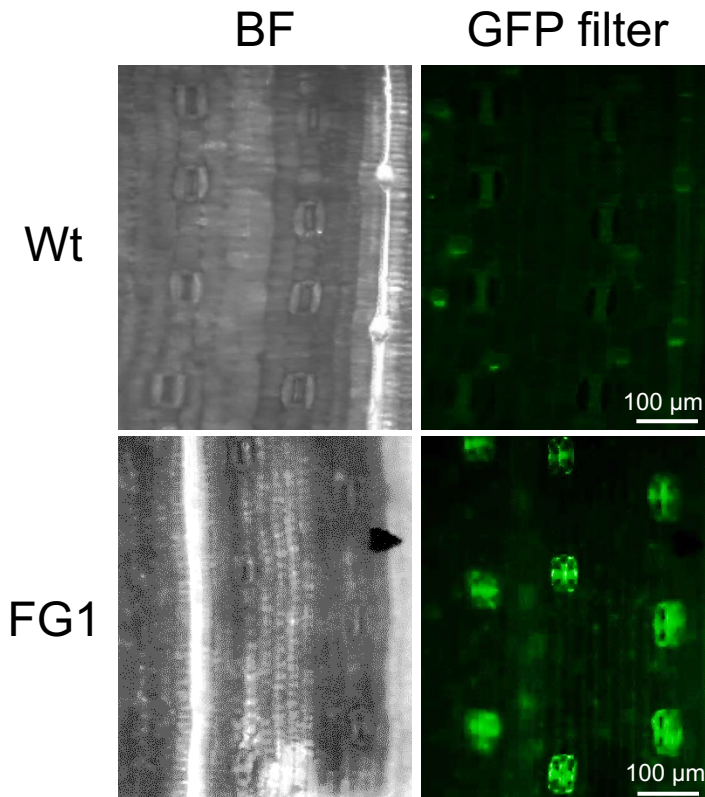

**Supplementary Figure S3. Bright-field (BF) and GFP images of T<sub>1</sub> leaf in a transgenic wheat plant.** Young leaves of FG1 (T<sub>1</sub> progeny) and wild-type (Wt) plants were sampled and observed under a Leica FW 4000 microscope (Leica, Germany) equipped with a GFP filter (Ex: BP489, Em: 508)

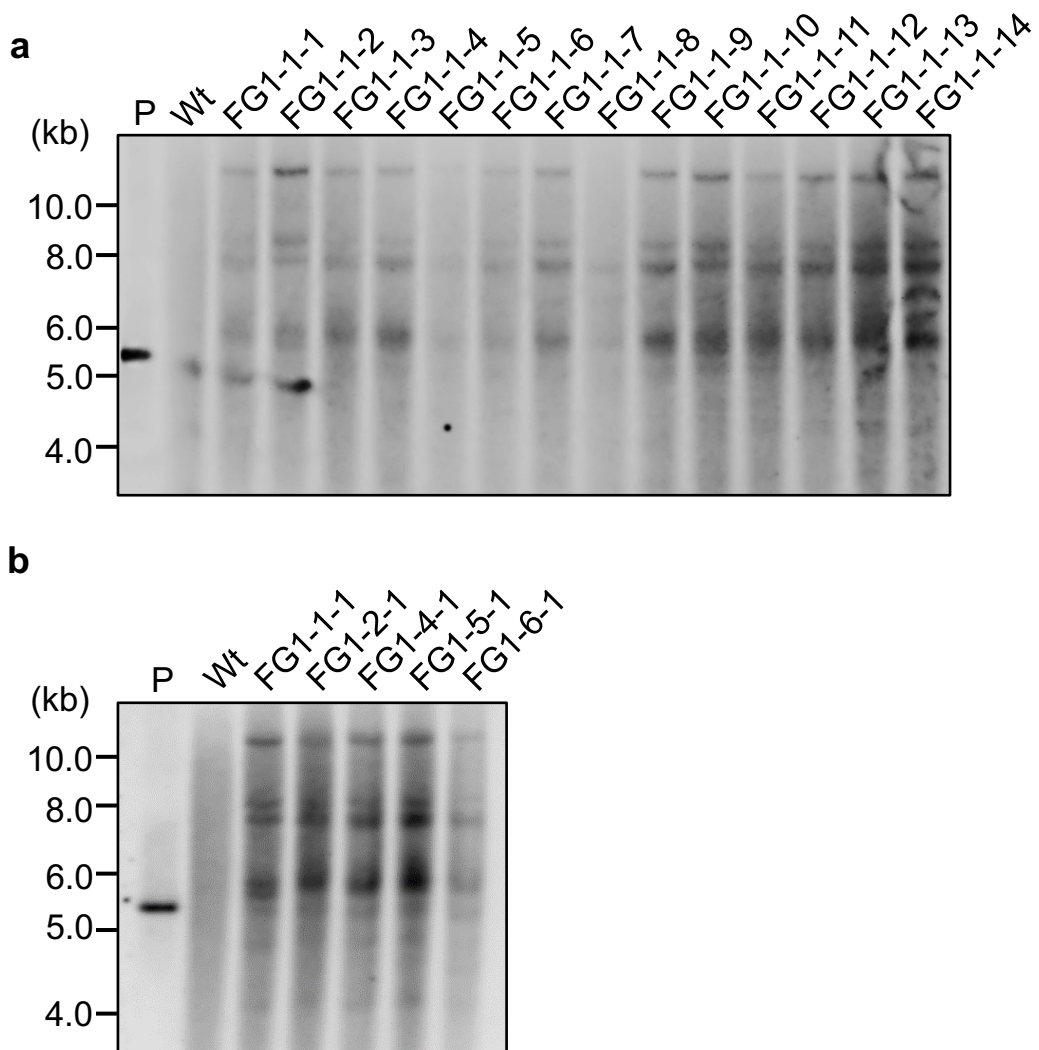

**Supplementary Figure S4. Genotypes of  $T_1$  transgenic wheat lines derived from each spike of the  $T_0$  progeny of 'Fielder' line FG1.** Transgenic wheat lines carrying *GFP* were analysed by DNA gel blot. Genomic DNA was extracted from each young leaf of the  $T_1$  progeny and digested with *Hind*III. The *GFP* gene-specific probe was hybridised to the blots. **(a)** Lane FG1-1-1~14: DNA from the transgenic  $T_1$  wheat plants harvested from the spikes of the main shoot. Lane P: 200 pg linearised *GFP* vector (5.1 kb) used as a positive control. **(b)** Lane FG1-1-1: DNA from a wheat plant harvested from the spike of the main shoot. Lane FG1-2-1: DNA from a wheat plant harvested from the spike of 1<sup>st</sup> tiller, Lane FG1-4-1: DNA from a wheat plant harvested from the spike of the third tiller. Lane FG1-5-1: DNA from a wheat plant harvested from the spike of the fourth tiller. Lane FG1-6-1: DNA from a wheat plant harvested from the spike of the sixth tiller.

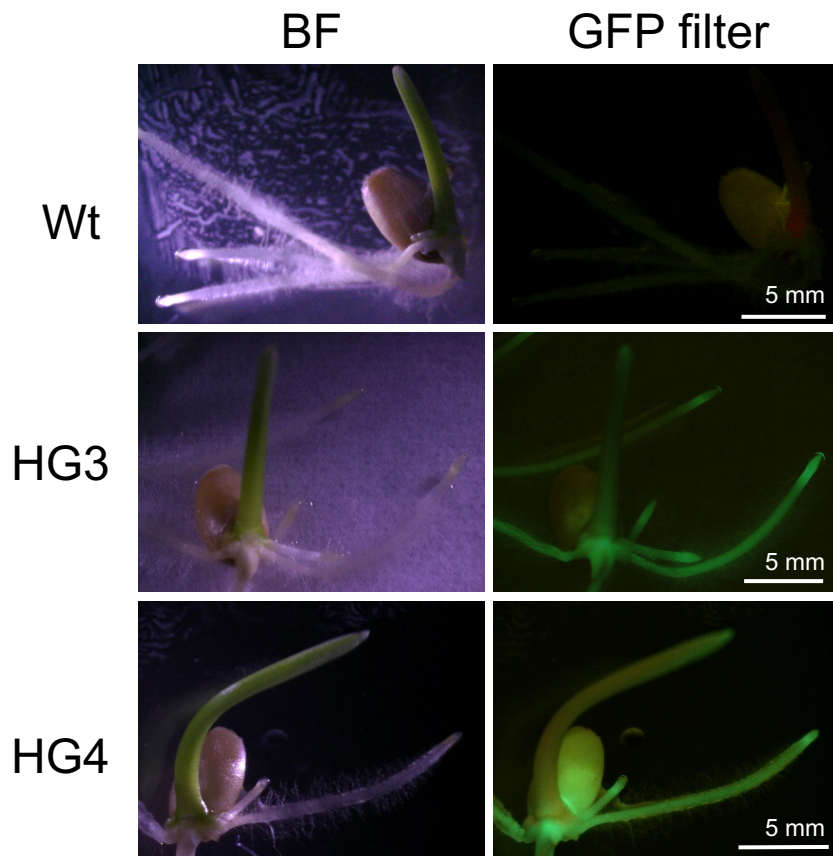

**Supplementary Figure S5. Bright-field (BF) and GFP images of T<sub>1</sub> seedlings in transgenic commercial wheat lines.** Each T<sub>1</sub> seedling of 'Haruyokoi' lines HG3 and HG4, and wild-type (Wt) was observed under a Olympus SZX16 stereomicroscope equipped with a GFP filter (Ex: BP460-495, Em: BA510IF).

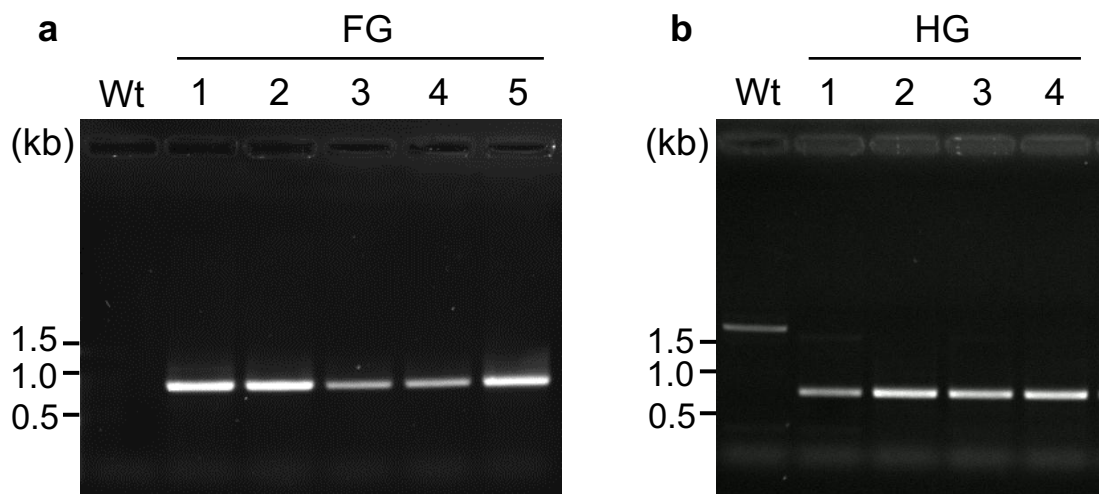

**Supplementary Figure S6. Integration of the *GFP* gene in transformed wheat lines.** (a) Genomic polymerase chain reaction (PCR) analysis of five independent transgenic ‘Fielder’ lines (FG1–5) and wild-type (Wt) lines. (b) Genomic PCR analysis of four independent transgenic ‘Haruyokoi’ lines (HG1–4) and wild-type (Wt) lines. Genomic DNA was extracted from each first leaf. Full-length gel images from Figure 2a and 4a are presented.

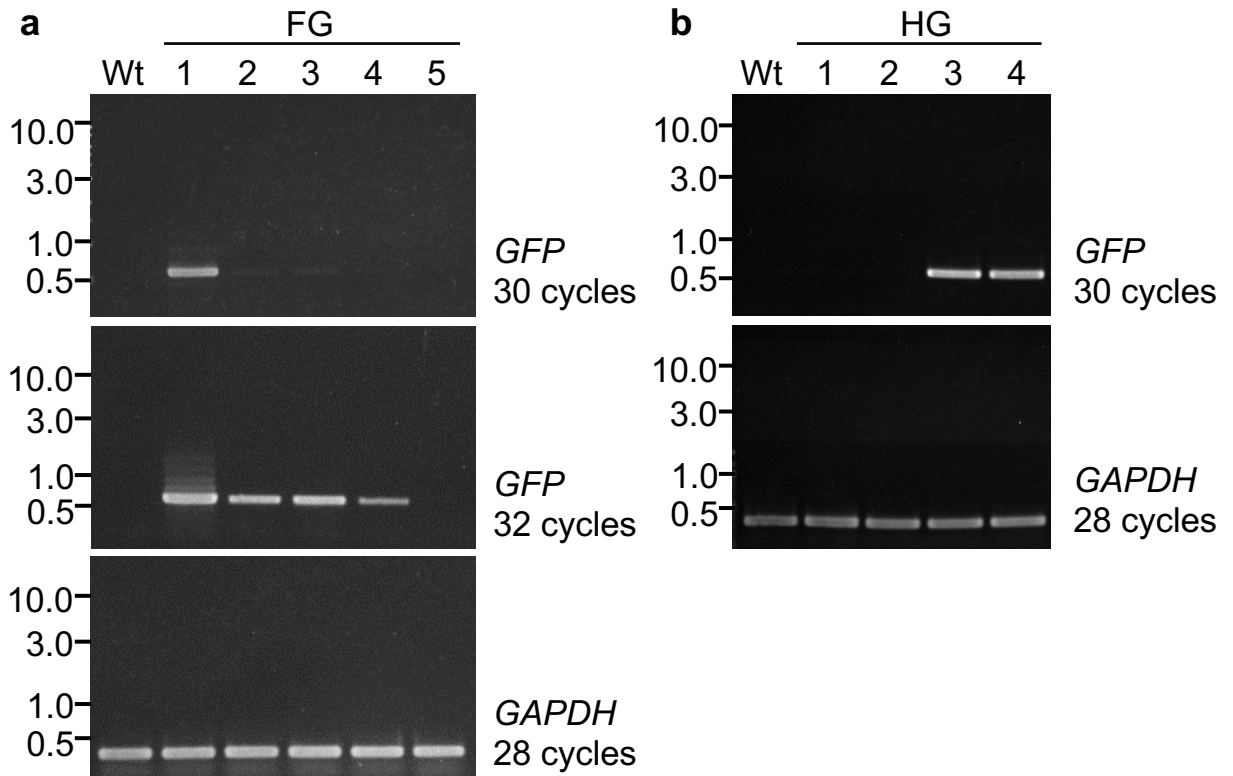

**Supplementary Figure S7. Expression of *GFP* in transgenic wheat plants.** (a) Reverse transcription polymerase chain reaction (RT-PCR) analysis of *GFP* in ‘Fielder’ lines (FG1–5) and wild-type (Wt) plants. (b) RT-PCR analysis of *GFP* expression in HG1–4 lines and Wt plants. The *GAPDH* gene (Genbank accession number: EF592180) was used as a housekeeping control. The full-length gel images from Figure 3a and 4b are presented.



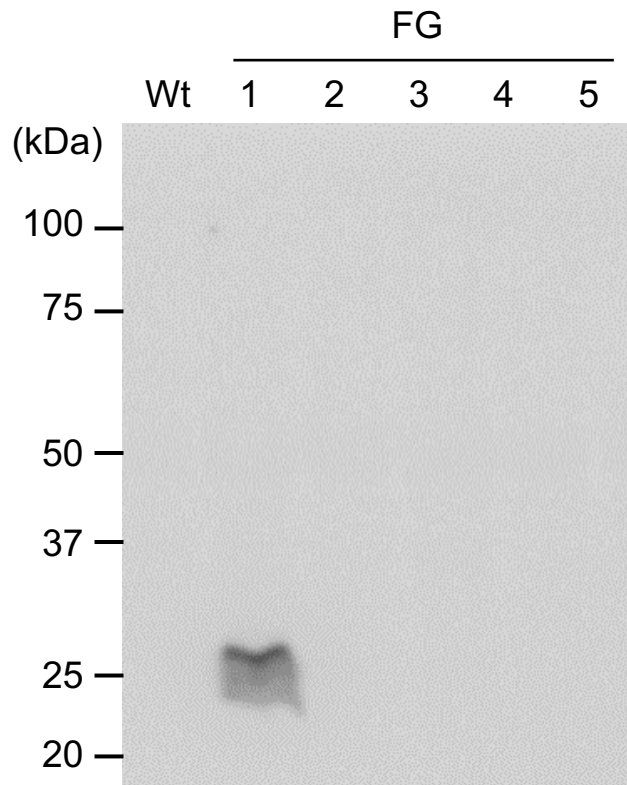

**Supplementary Figure S8. Expression of GFP protein in transgenic wheat plants.** Immunoblot analysis of green fluorescent protein (GFP) in transgenic plants (FG1-5) and wild-type (Wt). Total protein (20  $\mu$ g per lane) extracted from each T<sub>1</sub> leaf tissue was separated using sodium dodecyl sulphate-polyacrylamide gel electrophoresis (SDS-PAGE) and blotted. GFP was detected with anti-GFP antibodies. The full-length gel image from Figure 3b is presented.

Supplementary Table 1. Inheritance of the *GFP* gene in T<sub>1</sub> plants

| Cultivar  | Line ID | No. of T <sub>1</sub> seeds in primary spike | No. of T <sub>1</sub> seeds analysed | No. of transgenic T <sub>1</sub> plants* |
|-----------|---------|----------------------------------------------|--------------------------------------|------------------------------------------|
| Fielder   | FG1     | 35                                           | 31                                   | 26                                       |
|           | FG2     | 28                                           | 14                                   | 10                                       |
|           | FG3     | 10                                           | 10                                   | 8                                        |
|           | FG4     | 48                                           | 48                                   | 38                                       |
|           | FG5     | 43                                           | 20                                   | 1                                        |
| Haruyokoi | HG1     | 44                                           | 34                                   | 5                                        |
|           | HG2     | 46                                           | 36                                   | 1                                        |
|           | HG3     | 48                                           | 17                                   | 12                                       |
|           | HG4     | 52                                           | 30                                   | 22                                       |

\* Wheat was considered transgenic based on positive genomic PCR in T<sub>1</sub> progeny.

Supplementary Table 2. Polymerase chain reaction (PCR) analysis of T<sub>1</sub> plants harvested from each spike

| Spikes                 | No. of T <sub>1</sub> seeds in each spikes | No. of T <sub>1</sub> seeds analysed | No. of transgenic T <sub>1</sub> plants* |
|------------------------|--------------------------------------------|--------------------------------------|------------------------------------------|
| Main                   | 35                                         | 31                                   | 26                                       |
| 1 <sup>st</sup> tiller | 25                                         | 24                                   | 6                                        |
| 2 <sup>nd</sup> tiller | 25                                         | 25                                   | 0                                        |
| 3 <sup>rd</sup> tiller | 27                                         | 27                                   | 22                                       |
| 4 <sup>th</sup> tiller | 23                                         | 23                                   | 22                                       |
| 5 <sup>th</sup> tiller | 7                                          | 7                                    | 5                                        |

\* Wheat was considered transgenic based on positive genomic PCR in T<sub>1</sub> progeny.
